# Supplementary material
Source: PubMed Central journal article supplement (PMC2757055)

R.W. Alfano, Supplementary Figure 2

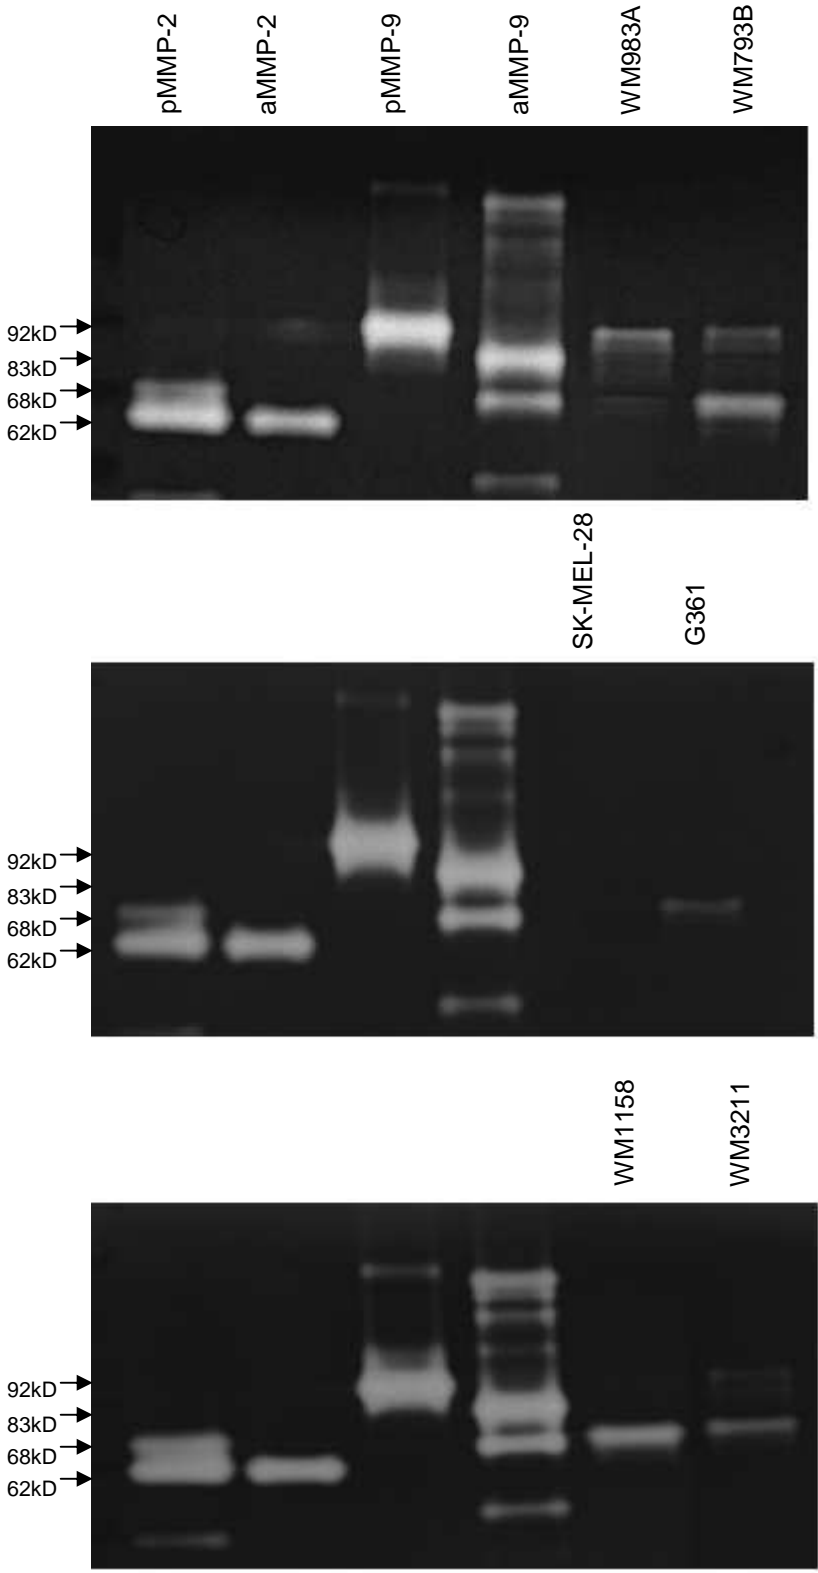

Supplement: NIHMS101971-supplement-Fig__S2.pdf [file NIHMS101971-supplement-Fig__S2.pdf]
